# Supplementary material
Source: MDPI journal article supplement (https://www.mdpi.com/2227-9040/9/12/342)
Supplement: s1 [file s1]

# Carbon Dioxide Sensing with Langmuir–Blodgett Graphene Films

Stevan Andrić, Milija Sarajlić, Miloš Frantlović, Ivana Jokić, Dana Vasiljević-Radović and Marko Spasenović \*

Center for Microelectronic Technologies, Institute of Chemistry, Technology and Metallurgy of the University of Belgrade, National Institute of the Republic of Serbia, Njegoševa 12, 11000 Belgrade, Serbia; stevan@nanosys.ihtm.bg.ac.rs (S.A.); milijas@nanosys.ihtm.bg.ac.rs (M.S.); frant@nanosys.ihtm.bg.ac.rs (M.F.); ijokic@nanosys.ihtm.bg.ac.rs (I.J.); dana@nanosys.ihtm.bg.ac.rs (D.V.-R.)

\* Correspondence: spasenovic@nanosys.ihtm.bg.ac.rs

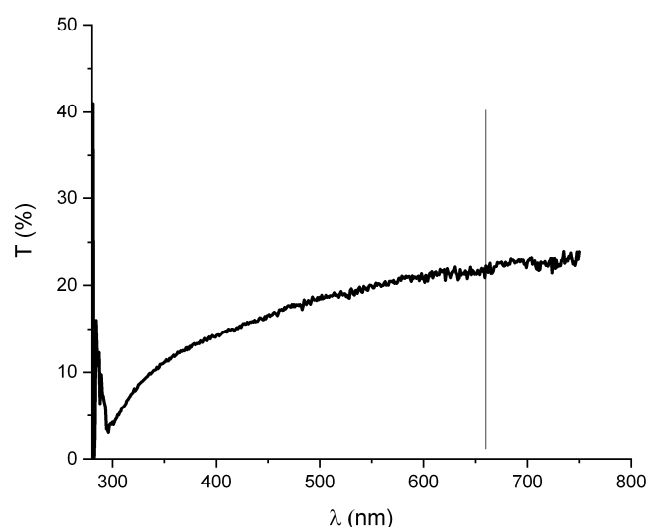

**Figure S1.** Optical transmittance spectrum of one of our graphene films. The transmittance of ~22% at a wavelength of 660 nm indicates average film thickness of ~11.5 nm.

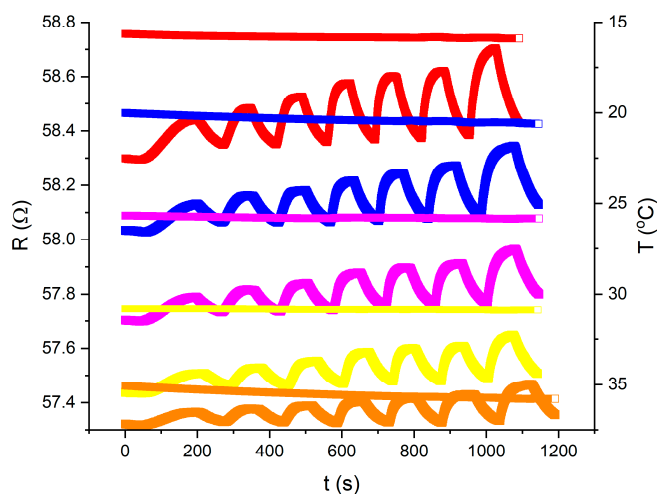

**Figure S2.** Temperature stability during the measurements. The nearly horizontal lines are measurements of temperature and should be referenced to the right vertical axis. The curves are measurements of resistance, also shown in Figure 4 of the main text, and correspond to values shown on the left vertical axis.

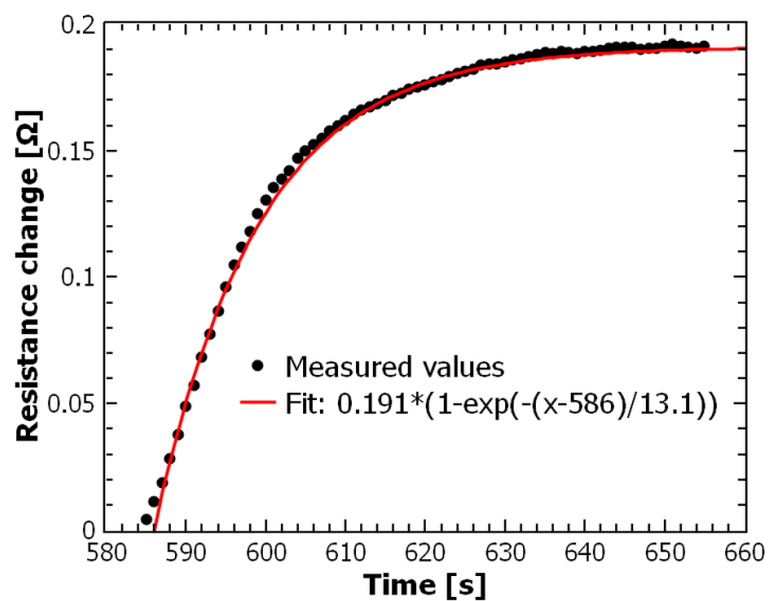

Figure S3. Exponential fit to experimental data.

Table S1. Original data for  $\Delta R_{\max}$ , measured from data shown in Figure 4 and plotted in Figures 5 and 8 of the main text.

| Temperature (°C) | 150 ppm | 300 ppm | 600 ppm | 1200 ppm | 2500 ppm | 5000 ppm | 10,000 ppm |
|------------------|---------|---------|---------|----------|----------|----------|------------|
| 15               | 0.14604 | 0.1355  | 0.17639 | 0.21742  | 0.23408  | 0.24768  | 0.3199     |
| 20               | 0.10367 | 0.0943  | 0.11506 | 0.15033  | 0.17289  | 0.19344  | 0.25571    |
| 25               | 0.08914 | 0.08279 | 0.10424 | 0.13838  | 0.14271  | 0.15283  | 0.19908    |
| 30               | 0.07137 | 0.06654 | 0.08926 | 0.1153   | 0.11987  | 0.12718  | 0.15955    |
| 35               | 0.04688 | 0.04731 | 0.06055 | 0.07661  | 0.08822  | 0.10187  | 0.13386    |
